# Supplementary material
Source: PubMed Central journal article supplement (PMC5394320)
Supplement: AEM.00269-17_zam999117804s1.pdf [file AEM.00269-17_zam999117804s1.pdf]

**Rupp et al.: Supplemental data**

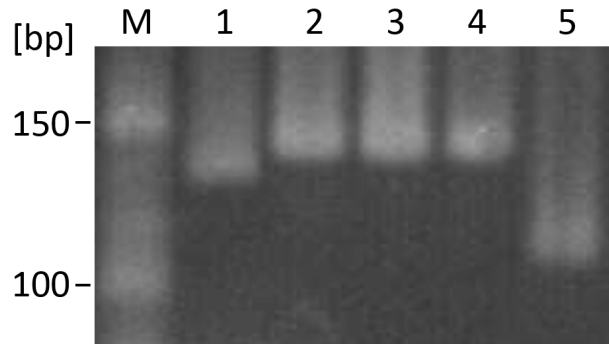

Fig. S1: PCR products of *B. cinerea* strain B05.10 (1), *B. fragariae* strains D13\_F\_Me3 (2), D11\_H\_R4 (3), D14\_F\_Ju20 (4), and *B. pseudocinerea* strain VD110 (5) with primer pair Mrr1-spez-F/-R .

**A**

hsp60: PhyML, 826 sites, GTR, 1000 replicates

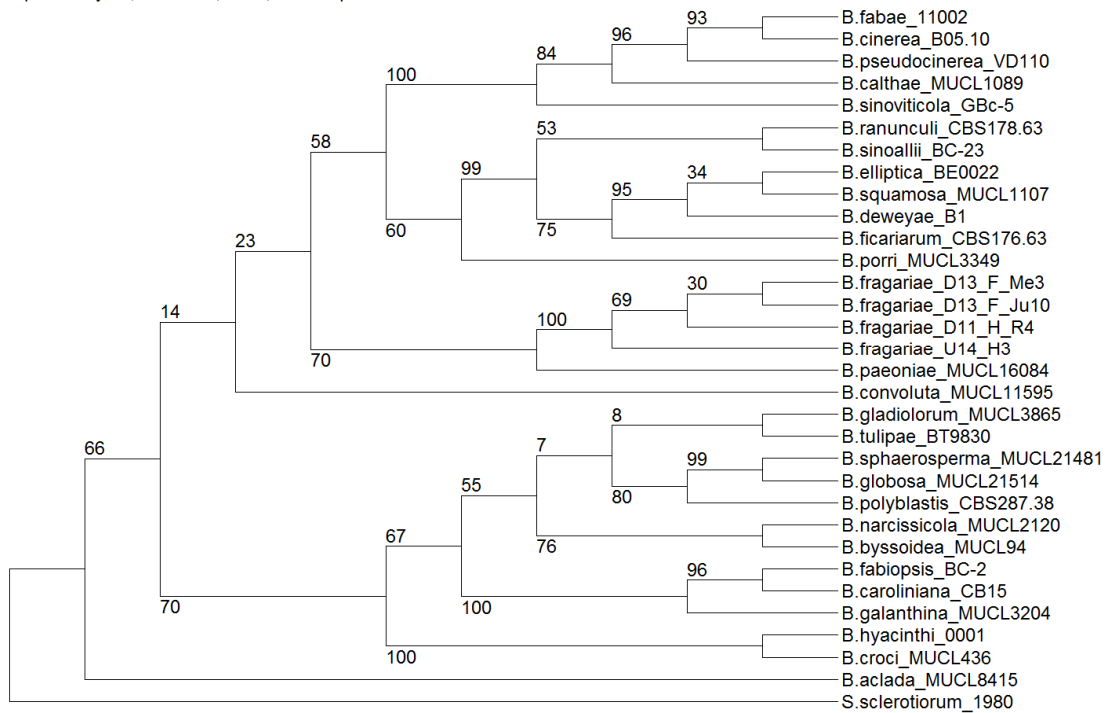

# B

g3pdh: PhyML, 804 sites, GTR, 1000 replicates

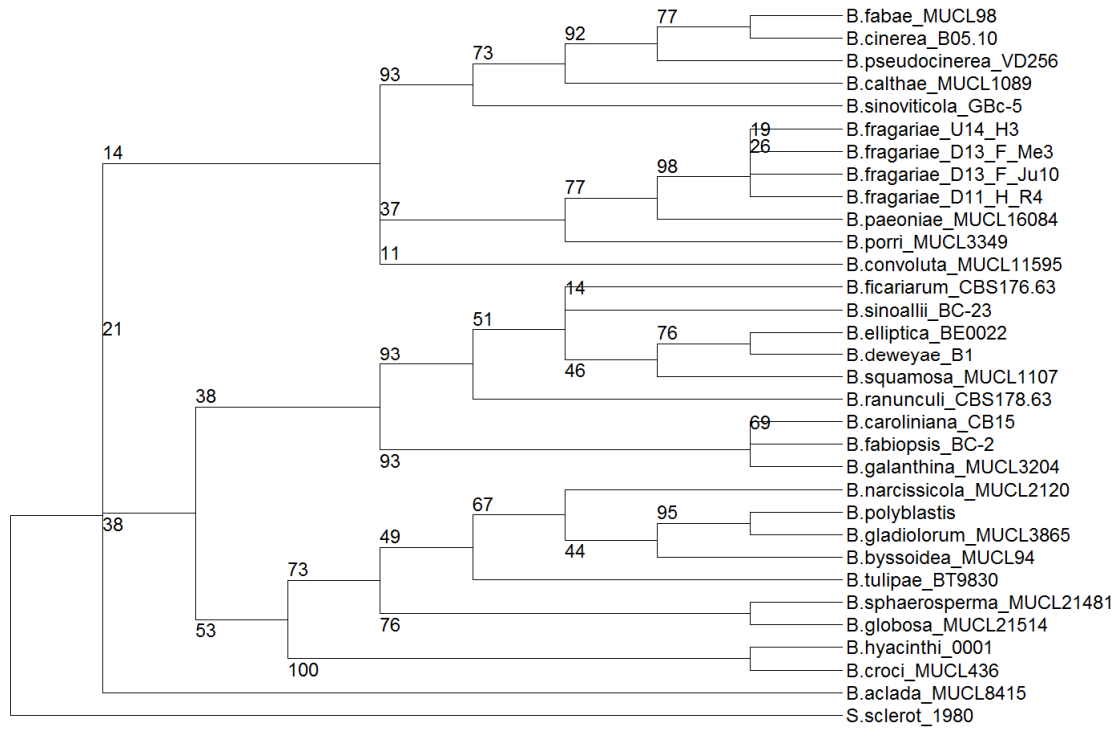

**C**

rpb2: PhyML, 794 sites, GTR, 1000 replicates

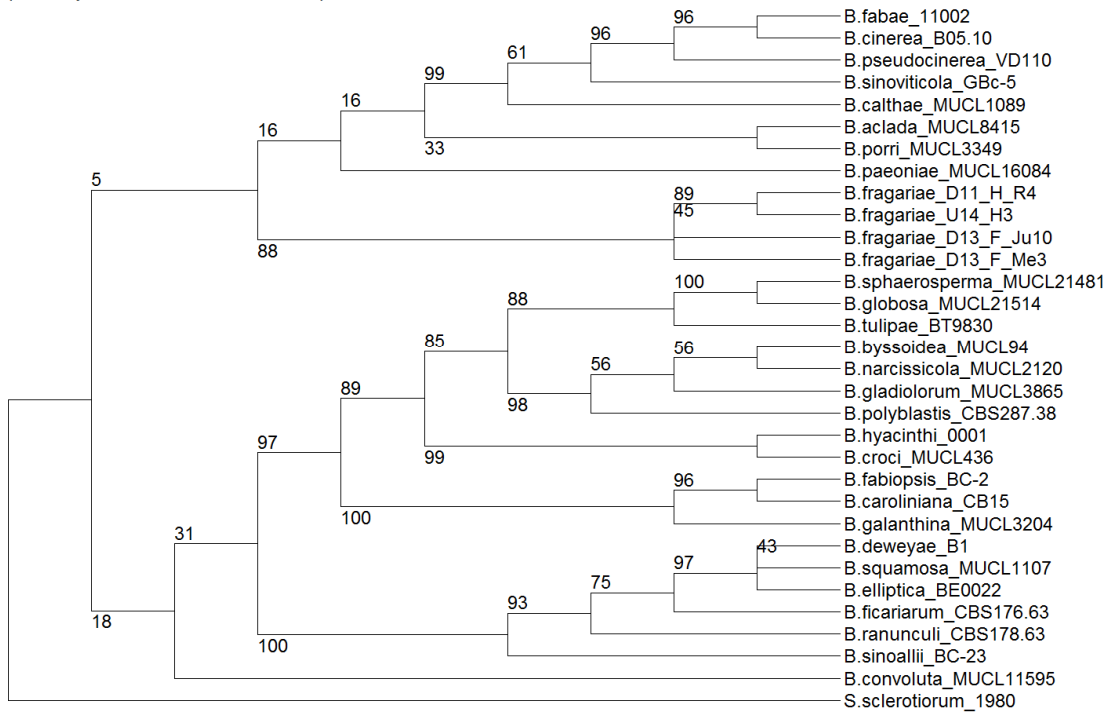

**D**

nep1: PhyML, 581 sites, GTR, 1000 replicates

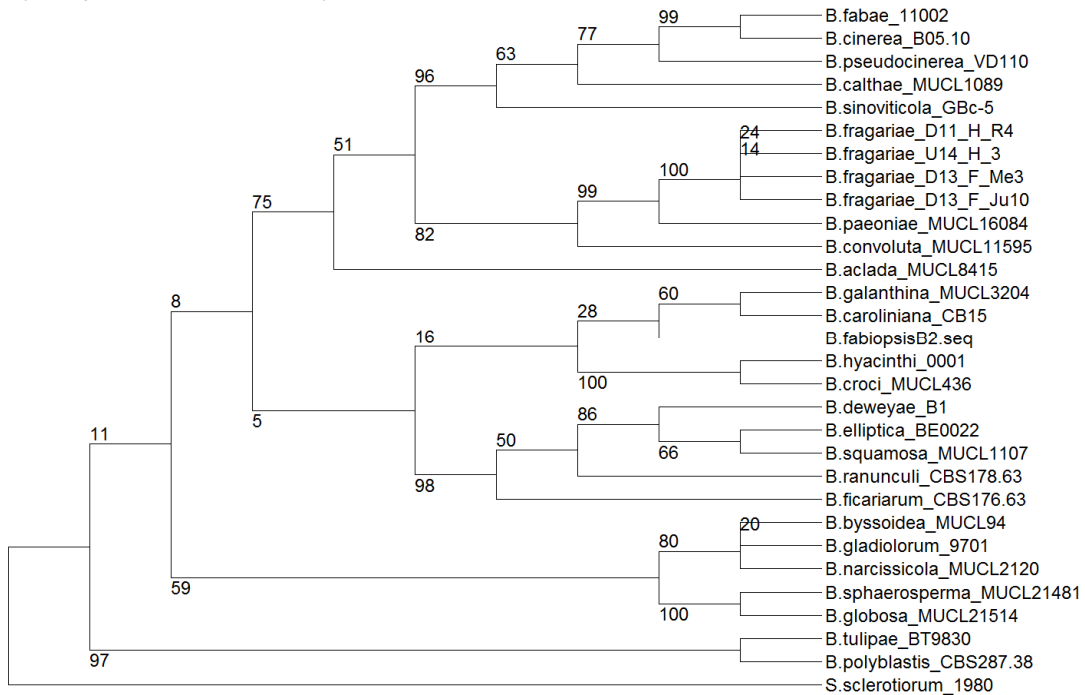

**E**

nep2: PhyML, 799 sites, GTR, 1000 replicates

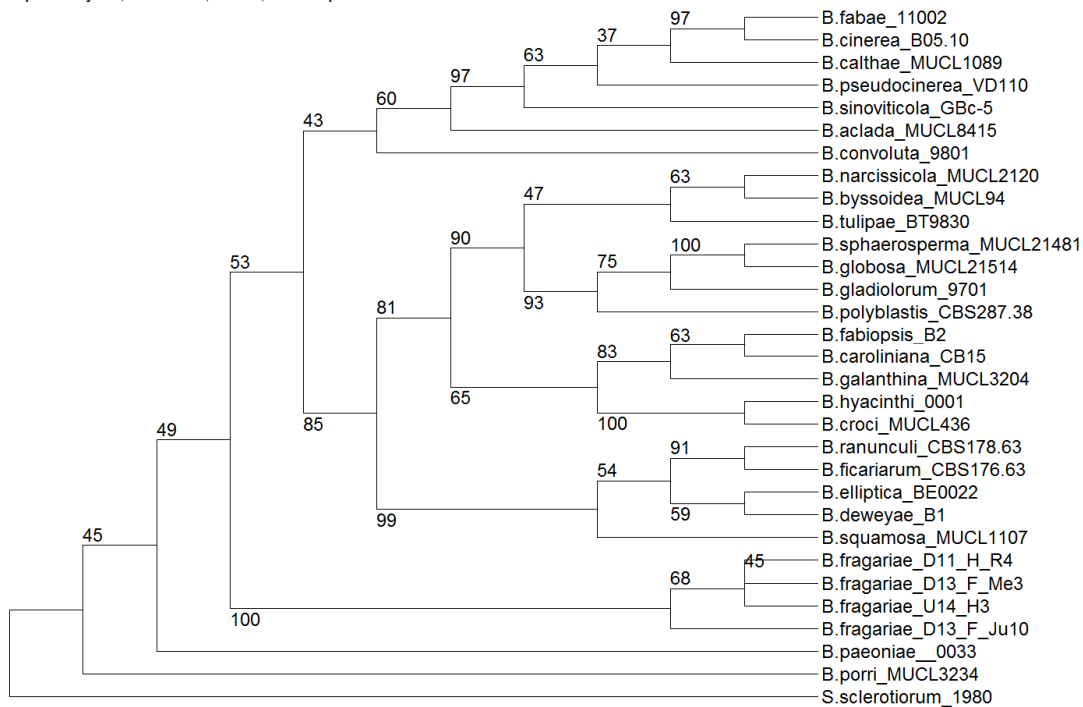

**Fig. S2:** Phylogenetic trees of *Botrytis* spp., including four strains of *B. fragariae* from Germany (strains D11\_H\_R4, D13\_F\_Me3, D13\_D\_F\_Ju10) and South Carolina (strain U14\_H3), based on combined sequences of *hsp60* (A), *g3pdh* (B), *rpb2* (C), *nep1* (D) and *nep2* (E). *Sclerotinia sclerotiorum* was used as outgroup.

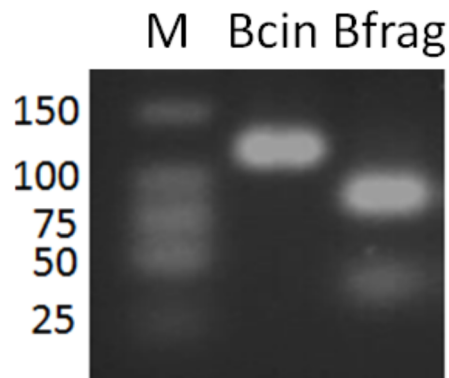

**Fig. S3:** Identification of *B. fragariae* by PCR-RFLP. Amplification with primers G3PDH\_785\_R/ G3PDH\_665\_F results in a 121 bp product that is cleaved by BsaJI, resulting in 86 bp and 35 bp fragments only with DNA of *B. fragariae* but not with *B. cinerea* or any other *Botrytis* species (data not shown).

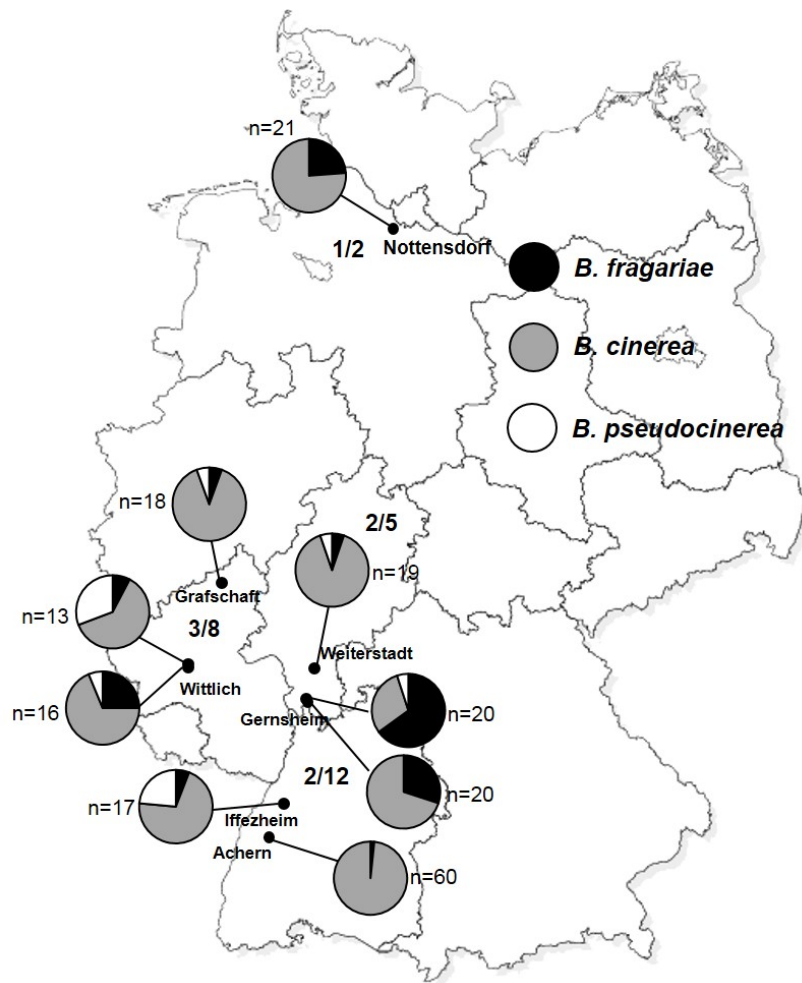

**Fig. S4:** Frequency of occurrence of *B. fragariae*, *B. cinerea* and *B. pseudocinerea* in Germany. Fields are shown in which *B. fragariae* was found and all isolates (n) were identified to the species level. The proportion of fields in which *B. fragariae* was observed is also indicated.

PhyML ln(L)=-14202.6 4163 sites GTR 1000 replic. 4 rate classes

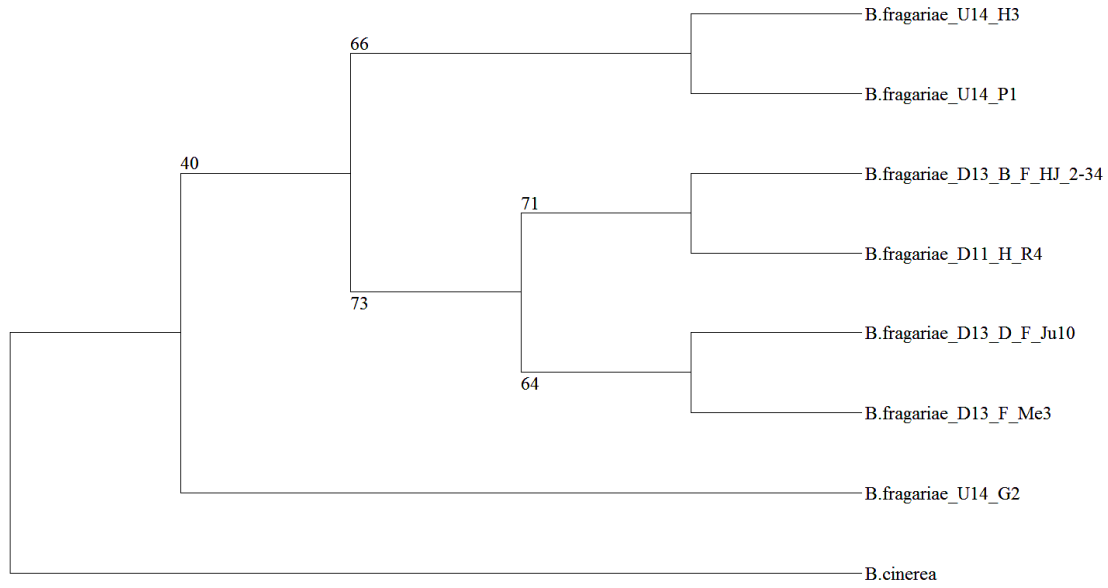

**Fig. S5:** Phylogenetic tree of four German and three US-American *B. fragariae* strains, based on *hsp60*, *g3pdh*, *rpb2*, *nep1* and *nep2*, using *B. cinerea* as outgroup.

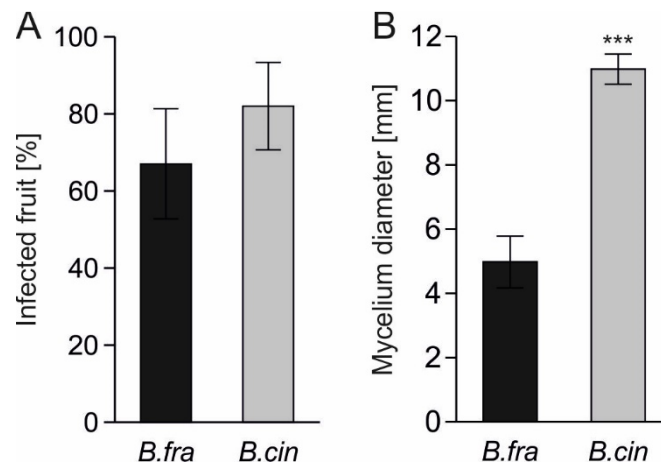

**Fig. S6:** Infection of strawberry tissues by *B. fragariae* and *B. cinerea* (4 d p.i.). A: Infection rate on fruit. B: Lesion formation on leaves. Significant differences between the species are indicated (\*\*\*: p<0.001, two-sided t-test).

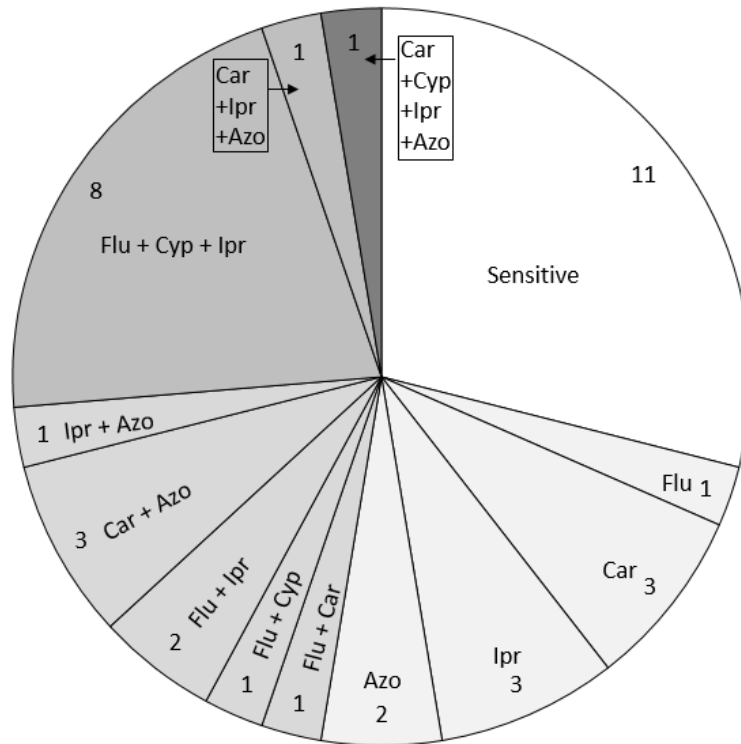

**Fig. S7:** Distribution of fungicide resistance in 38 *B. fragariae* isolates (cf. Table 2). Fen: Fenhexamid; Bos: Boscalid; Cyp: Cyprodinil; Azo: Azoxystrobin. Flu: Fludioxonil; Ipr: Iprodione; Car: Carbendazim.

Table S1: Primers used in this study.

| Name         | Sequence (5' – 3')          | Gene                        | Reference                  |
|--------------|-----------------------------|-----------------------------|----------------------------|
| BpsID_137F   | GCAGATGAGGCGGATGATAG        | BC1G_07159/<br>Bcin09g02270 | Plesken et al. 2015        |
| BpsID_273R   | TCCACCCAAGCATCATCTTC        |                             |                            |
| BcinN-in-F   | GCGACCTCATCGTTCTTTAC        | <i>mrr1</i>                 | Plesken et al. 2015        |
| BcinN-in-R   | GGCTCTCGATGAGCTGTTTC        |                             |                            |
| Mrr1-spez-F  | TATCGGTCTTGACAGTCCGC        | <i>mrr1</i>                 | Leroch et al., 2013        |
| Mrr1-spez-R  | TTCCGTACCCGATCTTCGGAA       |                             |                            |
| BC-hch262    | AAGCCCTTCGATGTCTTGGA        | <i>hch</i>                  | Fournier et al., 2005      |
| BC-hch520L   | ACGGATTCCGAACTAAGTAA        |                             |                            |
| Bc_Tub_for   | AAGATCCGCGAGGAGTTCCC        | <i>tubA</i>                 | This work                  |
| Bc_Tub_rev   | GGCGTGGGACGTTGTTAG          |                             |                            |
| BF1_56_opt   | TTAGCAGCCTGGCTGCATATAC      | <i>bos1</i>                 | This work                  |
| BR1_1084_opt | TTGTGCCATGACGTTGAC          |                             |                            |
| BF2          | CAACGTTATGGCACAAAATCTCA     | <i>bos1</i>                 | Ma et al., 2007            |
| BR2          | AAGTTTCTGGCCATGGTGTTC       |                             |                            |
| BF3_opt      | TCGAGGTTCCAGGGAGAAATC       | <i>bos1</i>                 | This work                  |
| BR3_opt      | CTATCCACGCGGTAAGTGAG        |                             |                            |
| BF4          | GCAAACCGTATGATCATGGA        | <i>bos1</i>                 | Ma et al., 2007            |
| BR4_opt      | TCTTCGGCCAAGAGAATGTC        |                             | This work                  |
| BR5          | AAGTACTCGCAGTCGGTGGT        | <i>bos1</i>                 | Ma et al., 2007            |
| BF5_opt      | TTCTCGCAATGGAAGAACC         |                             | This work                  |
| Qo13ext      | GGTATAACCCGACGGGTTATAGAATAG | <i>cytB</i>                 | Leroux et al., 2010        |
| Qo14ext      | AACCATCTCCATCCACCATACTACAAA |                             |                            |
| HSP60_fw     | CAACAATTGAGATTTGCCACAAG     | <i>hsp60</i>                | Staats et al., 2005        |
| HSP60_rev    | GATGGATCCAGTGGTACCGAGCAT    |                             |                            |
| G3PDH_fw     | ATTGACATCGTCGCTGTCAACGA     | <i>g3pdh</i>                | Staats et al., 2005        |
| G3PDH_rev    | ACCCACTCGTTGTCGTACCA        |                             |                            |
| G3PDH_785_R  | GTCACCGTTCATGTCAGTAG        | <i>g3pdh</i>                | This work                  |
| G3PDH_665_F  | ATGGTCTCTCAAGGGTAAG         |                             |                            |
| RPB2_fw      | GATGATCGTGATCATTTCGG        | <i>rpb2</i>                 | Staats et al., 2005        |
| RPB2_rev     | CCCATAGCTTGCTTACCCAT        |                             |                            |
| FG1020_fw    | GGAGGATGATATGGCAAAGTC       | <i>fg1020</i>               | Plesken et al. 2015        |
| FG1020_rev   | GGATTAAGAGCTTCACTACCA       |                             |                            |
| Nep1for      | CCAACGCAAATTCCTTTCTATCC     | <i>nep1</i>                 | Grant-Downton et al., 2014 |
| Nep1rev      | GTTGGCGAAGTTGTGGTCATTGAA    |                             |                            |
| NEP2forD     | TTGCCTTCTCAAATCATTACAGC     | <i>nep2</i>                 | Staats et al., 2007        |
| NEP2revD     | TCTAGAAAGTAGCCTTCGCAAGAT    |                             |                            |
| IGS1a        | TCCCGGTGAGCCTTTTA           | (IGS)                       | Kretschmer and Hahn, 2008  |
| IGS1b        | CCATCGGCCAGTAATCCAC         |                             |                            |
| atrB_RT_for  | CACCGGAGCAGGATTGAGTG        | <i>atrB</i>                 | This work                  |
| atrB_RT_rev  | GCGGAAGGTTGATGGATAG         |                             |                            |
| BcAct_RTfor  | TCTGTCTTGGGTCTTGAGAG        | <i>actin</i>                | Leroch et al., 2013        |
| BcAct_RTrev  | GGTGCAAGAGCAGTGATTTTC       |                             |                            |
| Tub_RT_fw    | TTCCGTGCTGTCAACGTTTC        | <i>tubA</i>                 | Leroch et al., 2013        |
| Tub_RT_rev   | ACGTTGCGCATTGGTCCTC         |                             |                            |
| MATalpha5    | ATGACGGCTCCCTCAAAC          | Mat1-1                      | This work                  |
| MATalpha3    | GGTGGTGAAGGGACATCTTC        |                             |                            |
| HMG5         | ATGTCTCTCTCTCTCCG           | Mat1-2                      | This work                  |
| HMG3         | GGAAAAGAATGTGTAGAGATCCTG    |                             |                            |
| Flipper-fw   | AGCCCTACCCATCGTCAAATAC      | (Flipper)                   | This work                  |
| Flipper-rev  | GCTCGGGATCATCATCTGAAAC      |                             |                            |



Table S2: Accession numbers of sequences used for assembling the phylogenetic trees.\*

|                                   | <i>hsp60</i> | <i>g3pdh</i> | <i>rpb2</i> | <i>nep1</i> | <i>nep2</i> |
|-----------------------------------|--------------|--------------|-------------|-------------|-------------|
| <i>B. fabae</i> CBS109.57         | AJ716074     | AJ705013     | AJ745685    | AM087025    | ---*1       |
| <i>B. pseudocinerea</i> 10091     | JN692400     | JN692414     | JN692428    | ---*1       | ---*1       |
| <i>B. calthae</i> MUCL1089        | AJ716061     | AJ705000     | AJ745672    | AM087031    | AM087088    |
| <i>B. sinoviticola</i> GBc-5      | JN692399     | JN692413     | JN692427    | ---*2       | ---*2       |
| <i>B. ranunculi</i> CBS178.63     | AJ716095     | AJ705034     | AJ745706    | AM087054    | AM087086    |
| <i>B. sinoalii</i> BC-23          | EU514488     | EU519217     | EU514479    | ---*2       | ---*2       |
| <i>B. elliptica</i> BE0022        | AJ716071     | AJ705010     | AJ745682    | AM087050    | AM087081    |
| <i>B. squamosa</i> MUCL1107       | AJ716098     | AJ705039     | AJ745710    | AM087052    | AM087084    |
| <i>B. deweyae</i> B1              | HG799519     | HG799521     | HG799518    | HG799527    | HG799520    |
| <i>B. ficariarum</i> CBS176.63    | AJ716076     | AJ705015     | AJ745687    | AM087055    | AM087085    |
| <i>B. parri</i> MUCL3349-3234     | AJ716093     | AJ705032     | AJ745704    | AM087060    | AM087063    |
| <i>B. paeoniae</i> MUCL16084      | AJ716089     | AJ705028     | AJ745700    | AM087033    | AM087064    |
| <i>B. convoluta</i> MUCL11595     | AJ716069     | AJ705008     | AJ745680    | AM087035    | AM087062    |
| <i>B. gladiolorum</i> MUCL3865    | AJ716081     | AJ705020     | AJ745692    | AM087041    | AM087072    |
| <i>B. tulipae</i> BT9830          | AJ716102     | AJ705041     | AJ745713    | AM087037    | AM087077    |
| <i>B. sphaerosperma</i> MUCL21481 | AJ716096     | AJ705035     | AJ745708    | AM087042    | AM087068    |
| <i>B. globosa</i> MUCL21514       | AJ716082     | AJ705021     | AJ745694    | AM087044    | AM087070    |
| <i>B. polyblastis</i> CBS287.38   | AJ716091     | AJ705030     | AJ745702    | AM087039    | AM087074    |
| <i>B. narcissicola</i> MUCL2120   | AJ716087     | AJ705026     | AJ745697    | AM087046    | AM087078    |
| <i>B. byssoidea</i> MUCL94        | AJ716059     | AJ704998     | AJ745670    | AM087045    | AM087079    |
| <i>B. fabiopsis</i> BC-2          | EU514482     | EU519211     | EU514473    | ---*2       | ---*2       |
| <i>B. caroliniana</i> _CB17       | JN672675     | JN672671     | JN672677    | JF811593    | ---*1       |
| <i>B. galanthina</i> MUCL3204     | AJ716078     | AJ705017     | AJ745690    | AM087058    | AM087067    |
| <i>B. hyacinthi</i> 0001          | AJ716084     | AJ705023     | AJ745695    | AM087048    | AM087066    |
| <i>B. croci</i> MUCL436           | AJ716070     | AJ705009     | AJ745681    | AM087047    | AM087065    |
| <i>B. aclada</i> MUCL8415         | AJ716050     | AJ704992     | AJ745664    | AM087059    | AM087087    |

\* Sequences of *B. cinerea* strain B05.10 and *Sclerotinia sclerotiorum* strain 1980 were obtained from genome assemblies provided by the EnsemblFungi website (<http://fungi.ensembl.org/index.html>).

\*1: Own unpublished sequence data. \*2: Unpublished sequence data (provided by Dr. Jing Zhang, Huazhong Agricultural University, Wuhan, China).

Table S3: Occurrence of *Botrytis species* on wild strawberries (*Fragaria vesca*) in Western Germany.

| Site* | No of isolates | <i>B. cinerea</i> |         | <i>B. pseudocinerea</i> | <i>B. fragariae</i> |
|-------|----------------|-------------------|---------|-------------------------|---------------------|
|       |                | Group N           | Group S |                         |                     |
| A     | 5              | 0                 | 2       | 3                       | 0                   |
| B     | 17             | 4                 | 11      | 2                       | 0                   |
| C     | 11             | 4                 | 1       | 6                       | 0                   |
| D     | 10             | 2                 | 5       | 3                       | 0                   |

\*Four sites located in the Palatine forest, Germany, Kaiserslautern.

Table S4: Fungicide treatments in fields from which *B. fragariae* isolates were recovered. \*For GE-Nottensdorf (the only site where isolates were obtained after the treatments), treatments of the 2011 season are shown.

| Field code       | Year | Treatments in the previous year*                                                                                                                             |
|------------------|------|--------------------------------------------------------------------------------------------------------------------------------------------------------------|
| GE-Nottensdorf   | 2011 | Fenhexamid* <sup>1</sup> (1x), Fludioxonil + Cyprodinil* <sup>2</sup> (2x), Boscalid + Pyraclostrobin* <sup>3</sup> (1x), Trifloxystrobin* <sup>4</sup> (1x) |
| GE-Iffezheim     | 2012 | None                                                                                                                                                         |
| GE-Weiterstadt   | 2012 | Fludioxonil + Cyprodinil (2x), Azoxystrobin, Fenhexamid                                                                                                      |
| GE-Grafschaft    | 2011 | Unknown                                                                                                                                                      |
| GE-Wittlich-A    | 2012 | Fludioxonil + Cyprodinil (1x)                                                                                                                                |
| GE-Wittlich-B    | 2013 | None                                                                                                                                                         |
| GE- Gernsheim-1  | 2012 | Unknown                                                                                                                                                      |
| GE- Gernsheim-1  | 2013 | Boscalid + Pyraclostrobin, Fludioxonil + Cyprodinil (2x) , Fenhexamid                                                                                        |
| GE-Wagshurst     | 2014 | None                                                                                                                                                         |
| US-Pelion-SC     | 2015 | None                                                                                                                                                         |
| US-Gilbert-SC    | 2015 | Captan, Fenhexamid, Fludioxonil + Cyprodinil                                                                                                                 |
| US-Holly Hill-SC | 2015 | Unknown                                                                                                                                                      |

\*Trade names: <sup>1</sup> Teldor®, <sup>2</sup> Switch®, <sup>3</sup> Signum®, <sup>4</sup> Flint®.

Table S5: *Botrytis* strains used for quantitative fungicide sensitivity assays (cf. Fig. 6) and *atrB* expression studies (cf. Fig. 7).

| Species             | Strain        | Fungicide sensitivity or resistance |            |           | Reference               |
|---------------------|---------------|-------------------------------------|------------|-----------|-------------------------|
|                     |               | Fludioxonil                         | Cyprodinil | Iprodione |                         |
| <i>B. cinerea</i>   | B05.10*       | S                                   | S          | S         | Leroch et al., 2013     |
| <i>B. cinerea</i>   | D06_5-16*     | MDR1                                | MDR1       | n.a.      | Kretschmer et al., 2009 |
| <i>B. cinerea</i>   | D08-H-8-07a*  | MDR1h                               | MDR1h      | n.a.      | Leroch et al., 2013     |
| <i>B. cinerea</i>   | D09_K_A04     | n.a.                                | n.a.       | HR        | This work               |
| <i>B. cinerea</i>   | D09_K_4_01    | n.a.                                | HR         | n.a.      | This work               |
| <i>B. cinerea</i>   | D09_K_F04     | n.a.                                | n.a.       | MR        | This work               |
| <i>B. fragariae</i> | D11_H_R4*     | S                                   | S          | MR        | This work               |
| <i>B. fragariae</i> | D13_F_HJ_2-34 | S                                   | S          | S         | This work               |
| <i>B. fragariae</i> | D13_F_Me3     | S                                   | S          | S         | This work               |
| <i>B. fragariae</i> | D13_F-Ju21    | MDR1                                | MDR1       | MR        | This work               |
| <i>B. fragariae</i> | D13_F-Ju26    | MDR1                                | MDR1       | n.a.      | This work               |
| <i>B. fragariae</i> | D14_F-Ju20*   | MDR1                                | HR         | HR        | This work               |
| <i>B. fragariae</i> | D13_F_Nba13   | n.a.                                | MDR1       | MR        | This work               |
| <i>B. fragariae</i> | D13_F_Ju10    | S                                   | S          | n.a.      | This work               |
| <i>B. fragariae</i> | D13_F_Ju1     | S                                   | S          | n.a.      | This work               |
| <i>B. fragariae</i> | D13_F_Ju29    | n.a.                                | HR         | n.a.      | This work               |
| <i>B. fragariae</i> | D14_F_Ju12    | n.a.                                | HR         | n.a.      | This work               |
| <i>B. fragariae</i> | D13_F_Nba10   | n.a.                                | n.a.       | S         | This work               |
| <i>B. fragariae</i> | D15_W_R3      | n.a.                                | n.a.       | HR        | This work               |
| <i>B. fragariae</i> | D14_Bl.427-22 | n.a.                                | n.a.       | HR        | This work               |

\*: Used for *atrB* expression studies. Abbreviations: S: Sensitive; MR: Medium resistant; HR: Highly resistant. n.a.: Not analysed in Fig. 6.

## References

- Fournier E, Giraud T, Albertini C, Brygoo Y.** 2005. Partition of the *Botrytis cinerea* complex in France using multiple gene genealogies. *Mycologia* **97**:1251–1267.
- Grant-Downton RT, Terhem RB, Kapralov MV, Mehdi S, Rodriguez-Enriquez MJ, Gurr SJ, van Kan JA, Dewey FM.** 2014. A novel *Botrytis* species is associated with a newly emergent foliar disease in cultivated *Hemerocallis*. *PLoS One* **9(6)**:e89272.
- Kretschmer M, Hahn M.** 2008. Fungicide resistance and genetic diversity of *Botrytis cinerea* isolates from a vineyard in Germany. *J Plant Dis Protect* **115**:214–219.
- Kretschmer M, Leroch M, Mosbach A, Walker AS, Fillinger S, Mernke D, Schoonbeek HJ, Pradier JM, Leroux P, de Waard MA** 2009. Fungicide-driven evolution and molecular basis of multidrug resistance in field populations of the grey mould fungus *Botrytis cinerea*. *PLoS Pathog* **5**:e1000696.
- Leroch M, Plesken C, Weber RWS, Kauff F, Scalliet G, Hahn M.** 2013. Gray mold populations in German strawberry fields are resistant to multiple fungicides and dominated by a novel clade closely related to *Botrytis cinerea*. *Appl Environ Microbiol* **79**:159–167.
- Leroux P, Gredt M, Leroch M, Walker AS.** 2010. Exploring mechanisms of resistance to respiratory inhibitors in field strains of *Botrytis cinerea*, the causal agent of gray mold. *Appl Environ Microbiol* **76**:6615-6630.
- Ma Z, Yan L, Luo Y, Michailides TJ.** 2007. Sequence variation in the two-component histidine kinase gene of *Botrytis cinerea* associated with resistance to dicarboximide fungicides. *Pestic Biochem Physiol* **88**:300–306.
- Plesken C, Weber RWS, Rupp S, Leroch M, Hahn M.** 2015. *Botrytis pseudocinerea* is a significant pathogen of several crop plants but susceptible to displacement by fungicide-resistant *B. cinerea* strains. *Appl Environ Microbiol* **81**:7048-7056.
- Staats M, van Baarlen P, Schouten A, van Kan JAL, Bakker FT.** 2007. Positive selection in phytotoxic protein-encoding genes of *Botrytis* species. *Fungal Genet. Biol.* **44**:52–63.
